# Supplementary material for: Two porous Co(ii) bithiophenedicarboxylate metal–organic frameworks: from a self-interpenetrating framework to a two-fold interpenetrating α-Po topological network
Source: Royal Society of Chemistry journal article supplement (doi:10.1039/c3ra44559c), 2013-12-17
Supplement: c3ra44559c.pdf [file c3ra44559c.pdf]

## Supporting Information

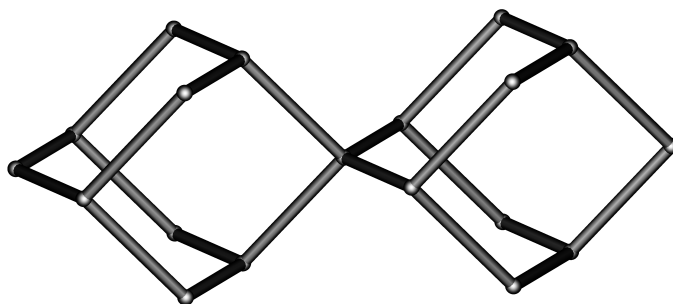

**Fig. S1** Diamond topological net of **1** constructed by btdc and Co(II) centres.

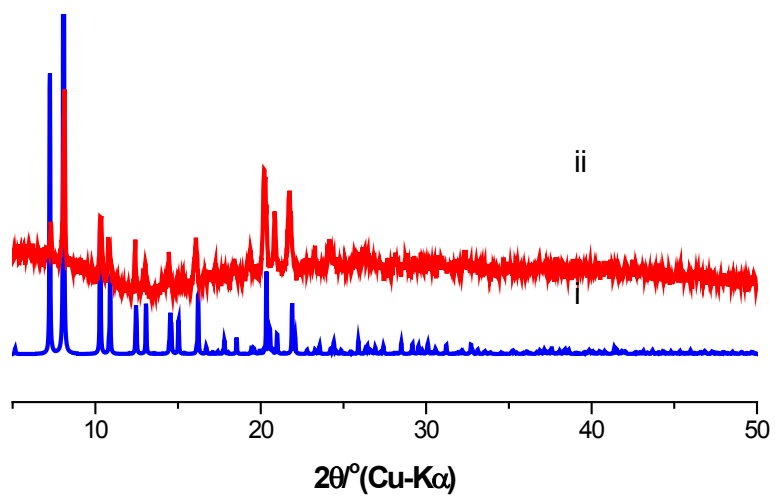

**Fig. S2** Simulated (i) and experimental (ii) PXRD pattern of **1**

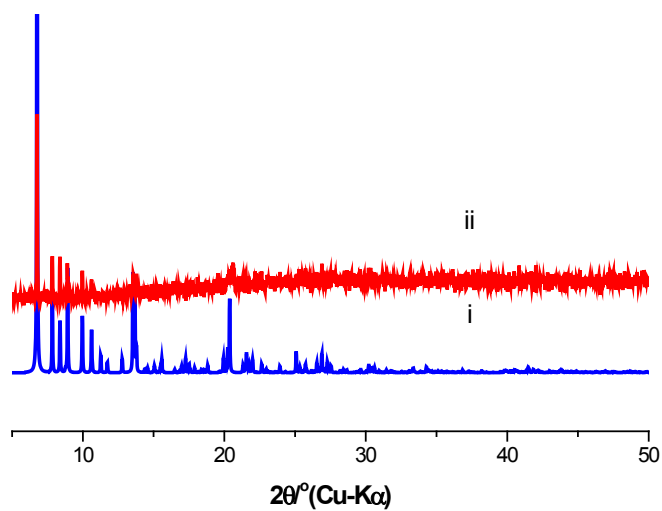

**Fig. S3** Simulated (i) and experimental (ii) PXR D pattern of **2**.

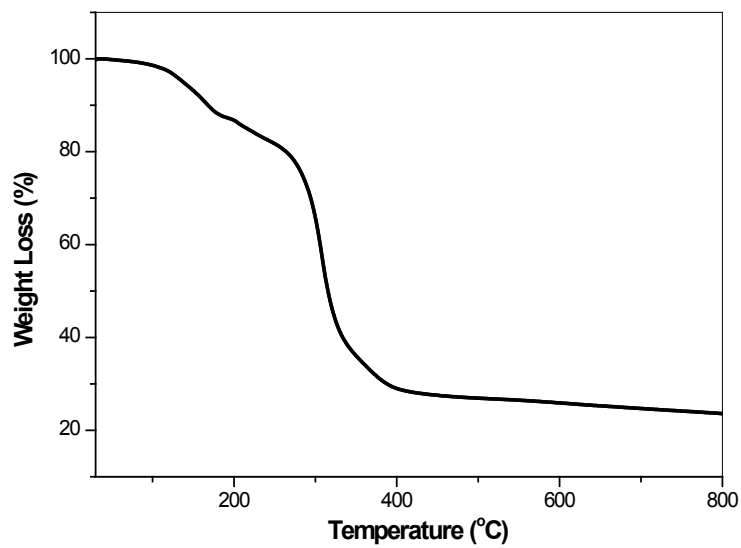

**Fig. S4** Thermal gravimetric analysis (TGA) for **1**

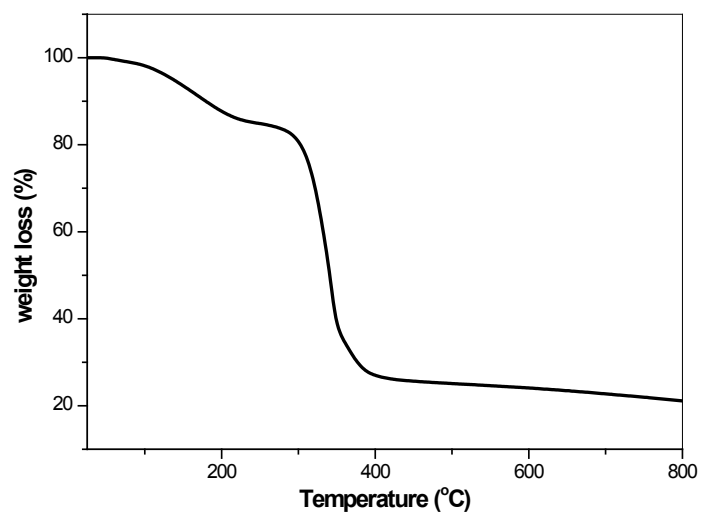

**Fig. S5** Thermal gravimetric analysis (TGA) for **2**
